# Supplementary material for: Identification of A Key Major-Effect QTL Associated With Pre-Harvest Sprouting in Cucumber (Cucumis Sativus L.) Using the QTL-Seq Method
Source: Research Square preprint supplement (doi:10.21203/rs.3.rs-137478/v1), 2021-01-04
Supplement: Supplementary file 1 [file 36ab64d6c9d5a14ff5d5454a.xlsx]

## Sheet: Sheet1
Identification of a Key Major-effect QTL Associated with Pre-harvest Sprouting in Cucumber (Cucumis sativus L.) Using the QTL-Seq Method
Mingming Cao1, Shuju Li1*, Qiang Deng1, Huizhe Wang2, Ruihuan Yang2
1Tianjin Kernel Cucumber Research Institute, Tianjin 300192, China
2Institute of Cucumber Research, Tianjin Academy of Agricultural Sciences, Tianjin 300192, China
* Correspondence:
Shuju Li
lishuju1964@126.com
Email address :
Mingming Cao: caoming2013@126.com
Shuju Li: lishuju1964@126.com
Qiang Deng: dengqiang022@126.com
Huizhe Wang: wanghuizhe@126.com
Ruihuan Yang: yruihuan@126.com

## Sheet: SNPs and InDels
TransID	Variants	Chromosome	Physical Positions	Reference bases	Mutant bases
Csa4G337350	upstream	Chr4	13778717	T	A
Csa4G337360	upstream	Chr4	13786976	T	A
Csa4G359270	upstream	Chr4	14538396	T	C
Csa4M494210.1	nonsynonymous	Chr4	17143696	C	A
Csa4G551650	upstream	Chr4	18251895	T	G
Csa4G551650	upstream	Chr4	18251951	A	G
Csa4G551650	upstream	Chr4	18251971	A	G
Csa4G551650	upstream	Chr4	18251973	C	A
Csa4M552160.1	nonsynonymous	Chr4	18277254	A	G
Csa4G569700	upstream	Chr4	18601010	T	C
Csa4M569700.1	nonsynonymous	Chr4	18605011	T	A
Csa4M569700.1	nonsynonymous	Chr4	18614772	C	T
Csa4G571740	upstream	Chr4	18726543	G	C
Csa4G575360	upstream	Chr4	18902949	A	C
Csa4G575360	upstream	Chr4	18902956	T	A
Csa4G575360	upstream	Chr4	18902969	A	G
Csa4G575360	upstream	Chr4	18902977	C	T
Csa4G576870	upstream	Chr4	18937823	C	T
Csa4G576870	upstream	Chr4	18938019	T	G
Csa4G576870	upstream	Chr4	18938031	T	C
Csa4G622760	upstream	Chr4	19973681	C	G
Csa4G622760	upstream	Chr4	19973692	G	T
Csa4G622760	upstream	Chr4	19973724	C	A
Csa4G622760	upstream	Chr4	19973741	T	C
Csa4G622760	upstream	Chr4	19973782	A	T
Csa4G622800	upstream	Chr4	19995077	A	G
Csa4G622800	upstream	Chr4	19995107	G	A
Csa4G622800	upstream	Chr4	19995109	C	G
Csa4G622800	upstream	Chr4	19995123	A	C
Csa4G622800	upstream	Chr4	19995137	C	A
Csa4M627140.2	nonsynonymous	Chr4	20281929	A	G
Csa4M628930.1	nonsynonymous	Chr4	20505510	T	C
Csa4G628930	upstream	Chr4	20508121	T	A
Csa4G628930	upstream	Chr4	20508146	T	C
Csa4G628930	upstream	Chr4	20508154	A	T
Csa4G629460	downstream	Chr4	20521003	T	A
Csa4G629450	upstream	Chr4	20521003	T	A
Csa4G629460	downstream	Chr4	20521004	T	A
Csa4G629450	upstream	Chr4	20521004	T	A
Csa4G637700	downstream	Chr4	20786121	T	C
Csa4G637710	upstream	Chr4	20786121	T	C
Csa4G637700	downstream	Chr4	20786124	G	C
Csa4G637710	upstream	Chr4	20786124	G	C
Csa4G637700	downstream	Chr4	20786128	T	C
Csa4G637710	upstream	Chr4	20786128	T	C
Csa4G637710	upstream	Chr4	20786335	T	A
Csa4G637720	upstream	Chr4	20788903	A	G
Csa4G637720	upstream	Chr4	20789489	C	T
Csa4G637730	upstream	Chr4	20791424	T	C
Csa4G637740	upstream	Chr4	20791424	T	C
Csa4G637730	upstream	Chr4	20791425	T	C
Csa4G637740	upstream	Chr4	20791425	T	C
Csa4G637730	upstream	Chr4	20791506	C	G
Csa4G637740	upstream	Chr4	20791506	C	G
Csa4G637730	upstream	Chr4	20791587	A	T
Csa4G637740	upstream	Chr4	20791587	A	T
Csa4G637730	upstream	Chr4	20791594	G	A
Csa4G637740	upstream	Chr4	20791594	G	A
Csa4G639140	upstream	Chr4	21075529	C	T
Csa4G639140	upstream	Chr4	21075980	G	A
Csa4G337360	upstream	Chr4	13786987	A	-
Csa4G491190	upstream	Chr4	17115047	-	TATATATA
Csa4G571740	upstream	Chr4	18726596	TTAAAGCCAATTTCCAATTATAAGCA	-
Csa4G575360	upstream	Chr4	18902954	C	-
Csa4G576870	upstream	Chr4	18937987	-	CAA
Csa4G628340	upstream	Chr4	20437429	-	A
Csa4G637720	upstream	Chr4	20789486	-	CTTTAAAACTAGTTA
Csa4G639140	upstream	Chr4	21075353	TTATTGAAATAAA	-
Csa4G639140	upstream	Chr4	21075917	-	TATTACTAAC
Csa4G639150	upstream	Chr4	21079500	A	-
Csa4G639140	downstream	Chr4	21079500	A	-
Csa5G168950	upstream	Chr5	6688410	AA	-
Csa5G171160	upstream	Chr5	6840412	-	ATATA
